# Supplementary material for: Quantitative Proteomics Reveals that Hsp90 Inhibition Dynamically Regulates Global Protein Synthesis in Leishmania mexicana
Source: PubMed Central journal article supplement (PMC8125071; doi:10.1128/msystems.00089-21), 2021-05-11
Supplement: mSystems.00089-21-sf001.pdf [file mSystems.00089-21-sf001.pdf]

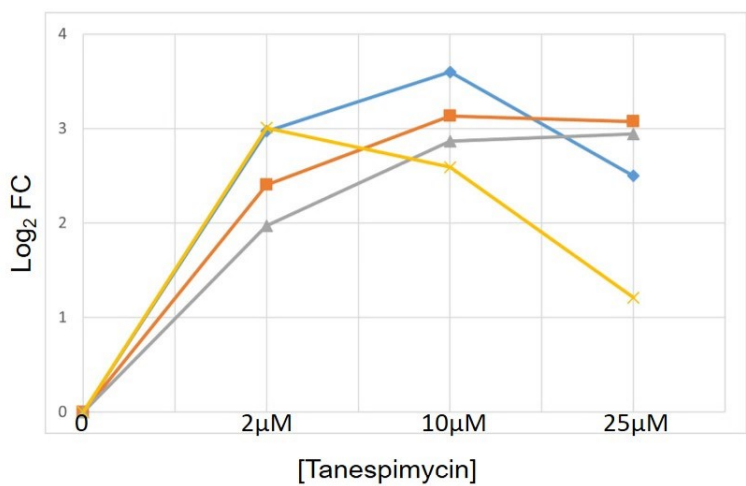

Heat shock protein 83-1      Uncharacterized protein  
 Histone H4      Putative heat-shock protein hsp70

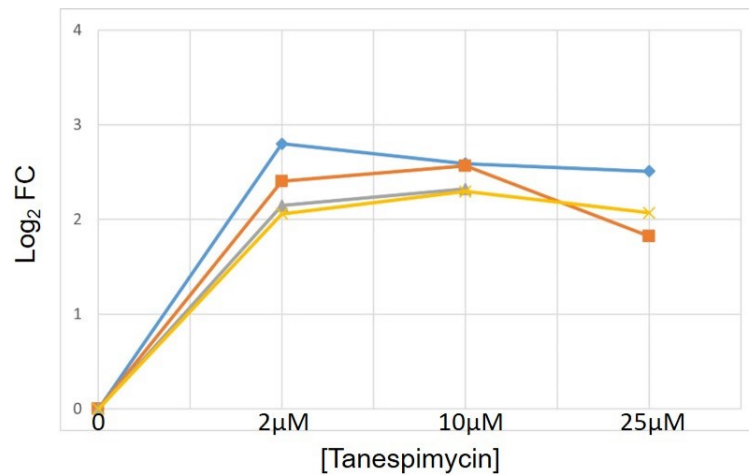

ATP synthase subunit beta      Dihydrolipoyl dehydrogenase  
 Putative ribosomal protein S20      Elongation factor 2

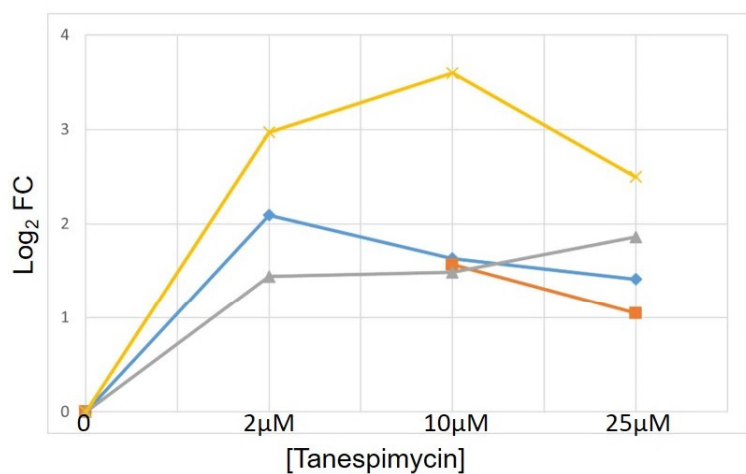

Glycosomal membrane protein      40S ribosomal protein S4  
 Putative RNA binding protein      Heat shock protein 83-1

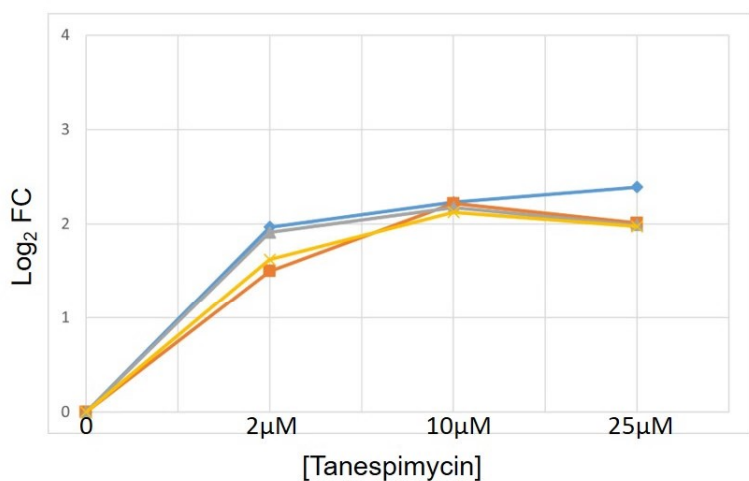

Histone H2B      Phosphoenolpyruvate carboxykinase  
 Malate dehydrogenase      Putative histone H3 variant

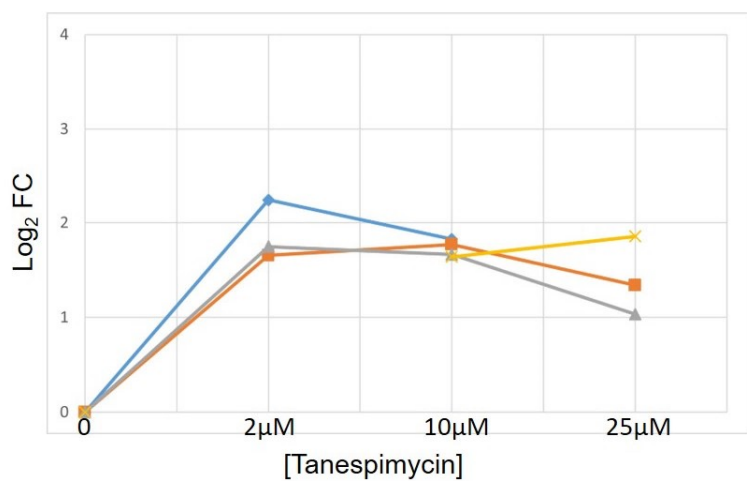

Chaperonin HSP60, mitochondrial      Tryparedoxin peroxidase  
 Elongation factor 1-alpha      Putative 60S ribosomal protein L34

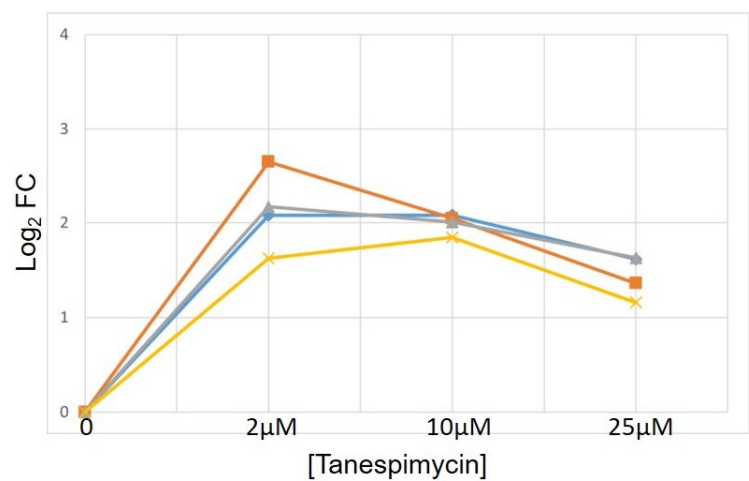

Transaldolase      Putative heat shock protein  
 Uncharacterized protein      Tubulin alpha chain
