# Supplementary material for: Quantitative Proteomics Reveals that Hsp90 Inhibition Dynamically Regulates Global Protein Synthesis in Leishmania mexicana
Source: PubMed Central journal article supplement (PMC8125071; doi:10.1128/msystems.00089-21), 2021-05-11

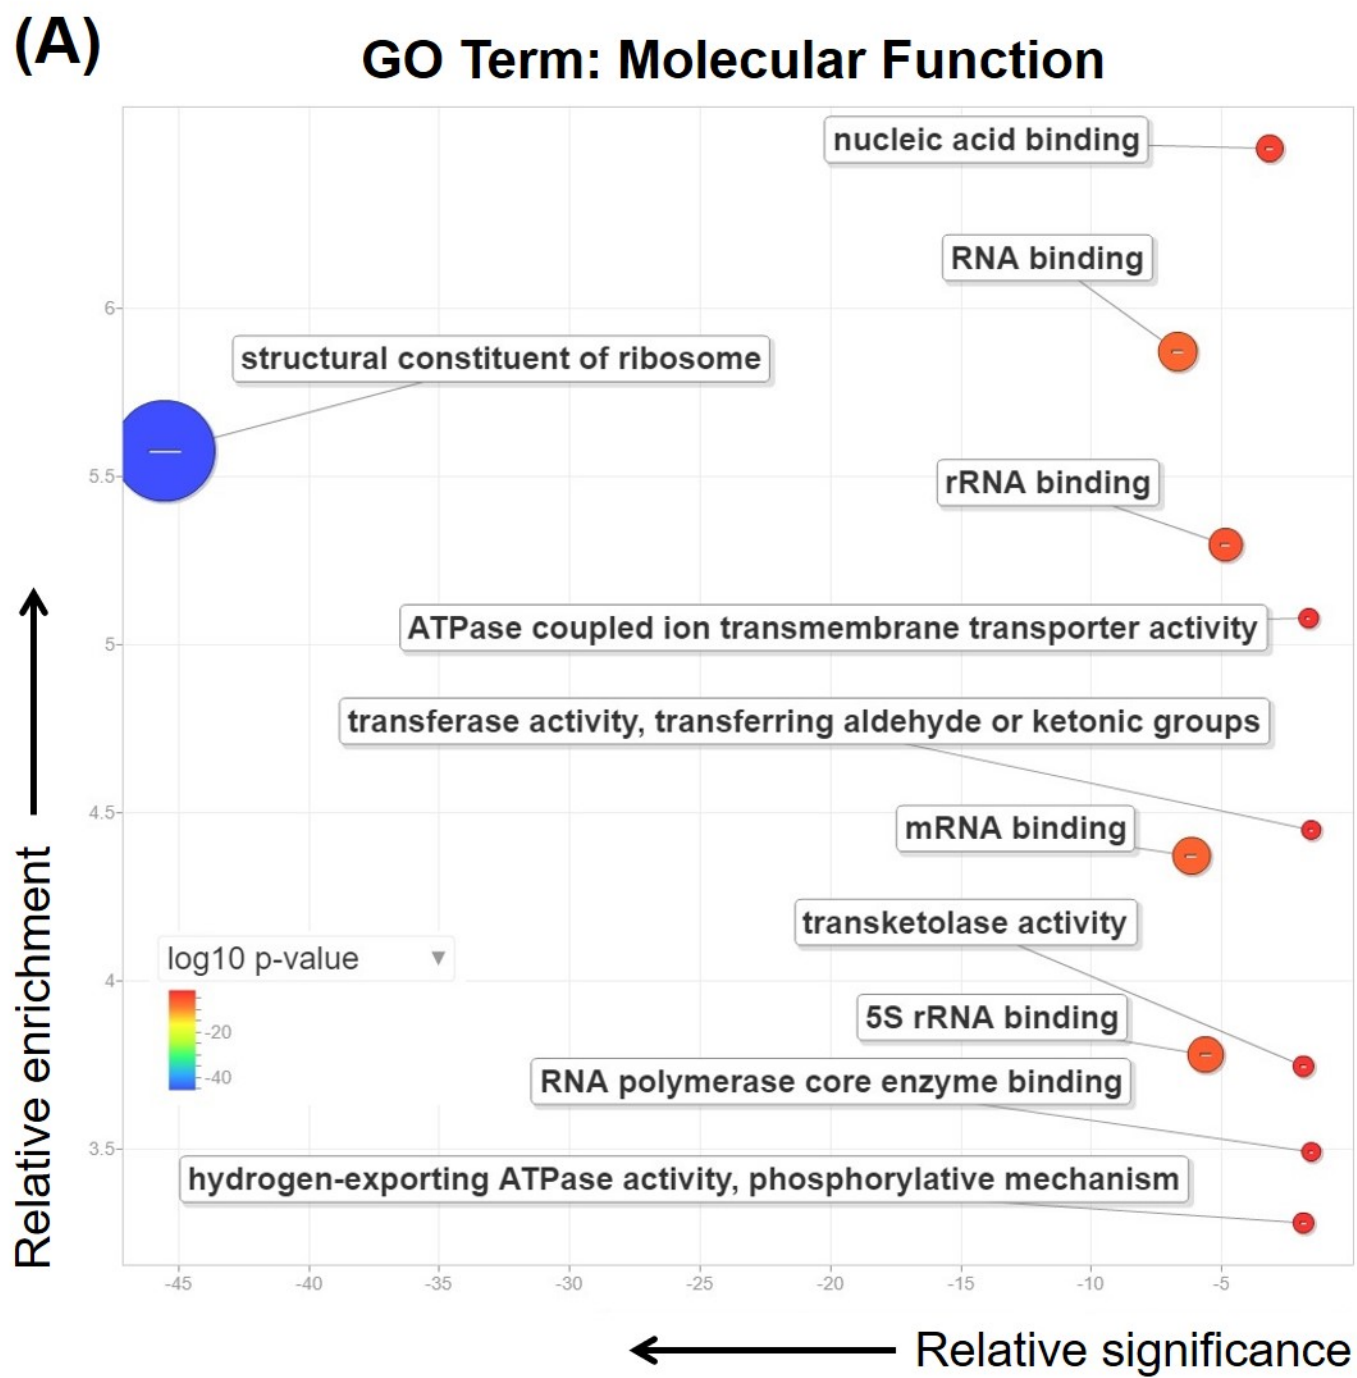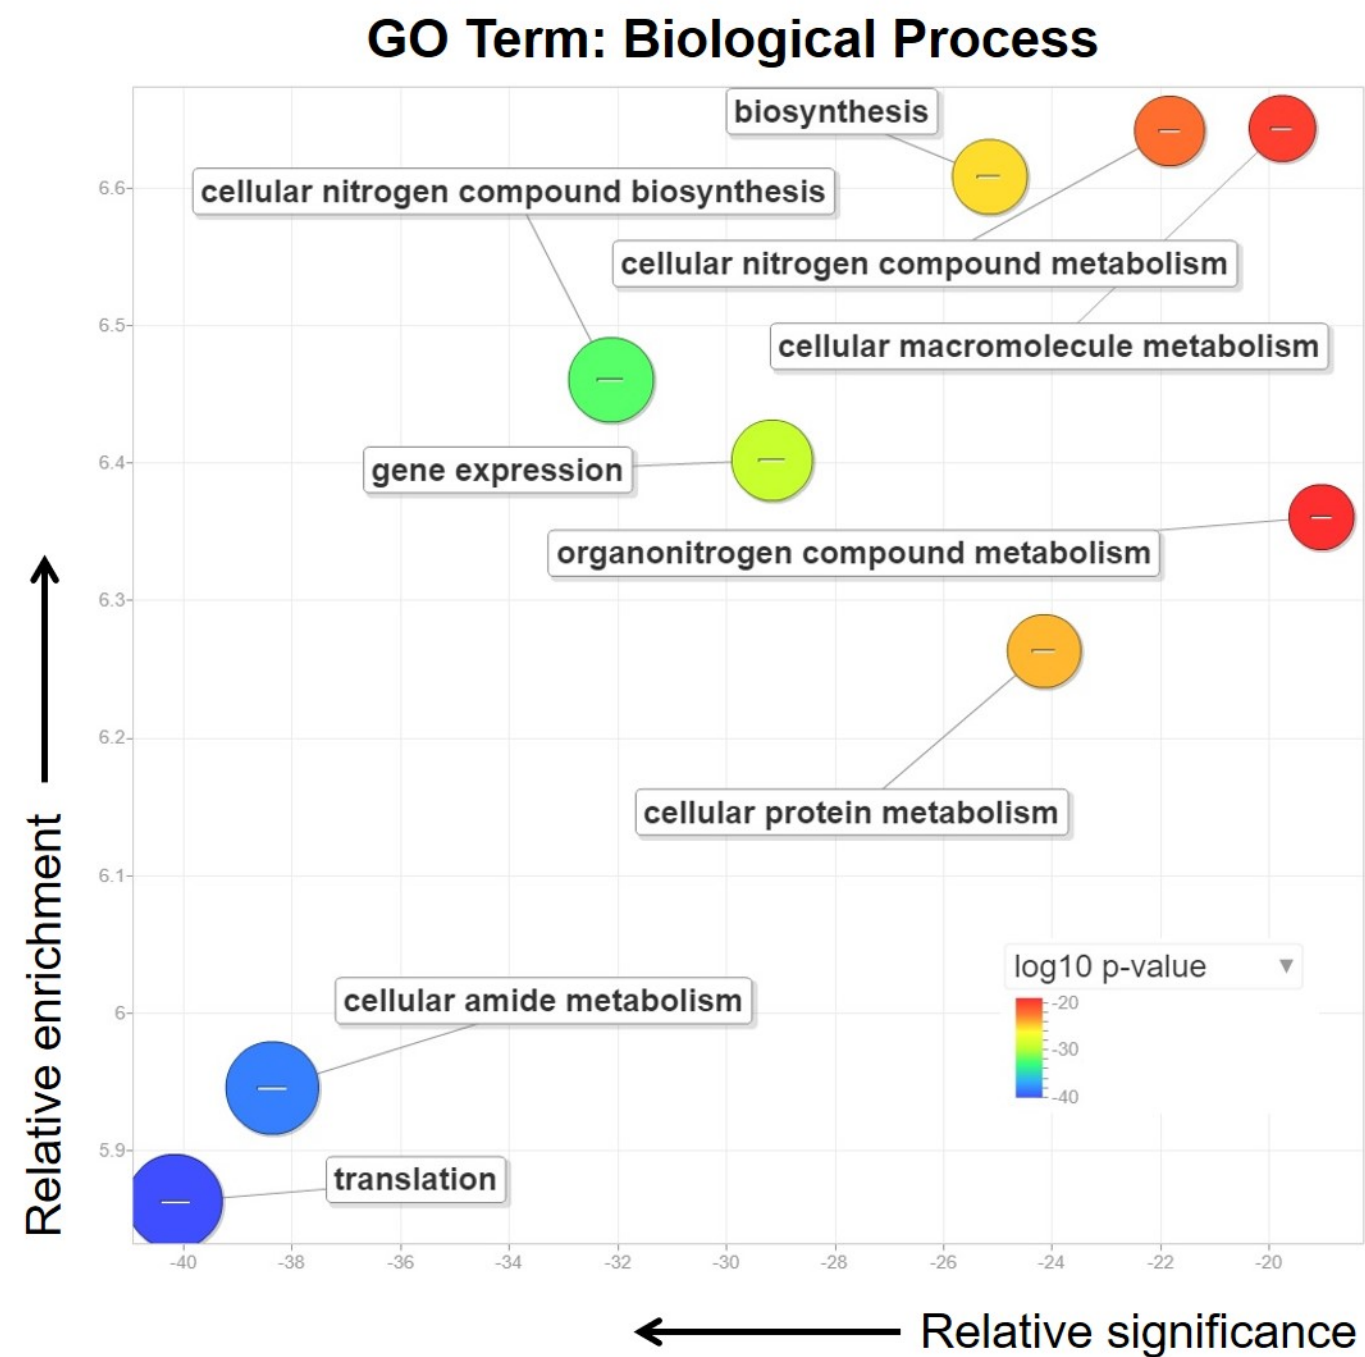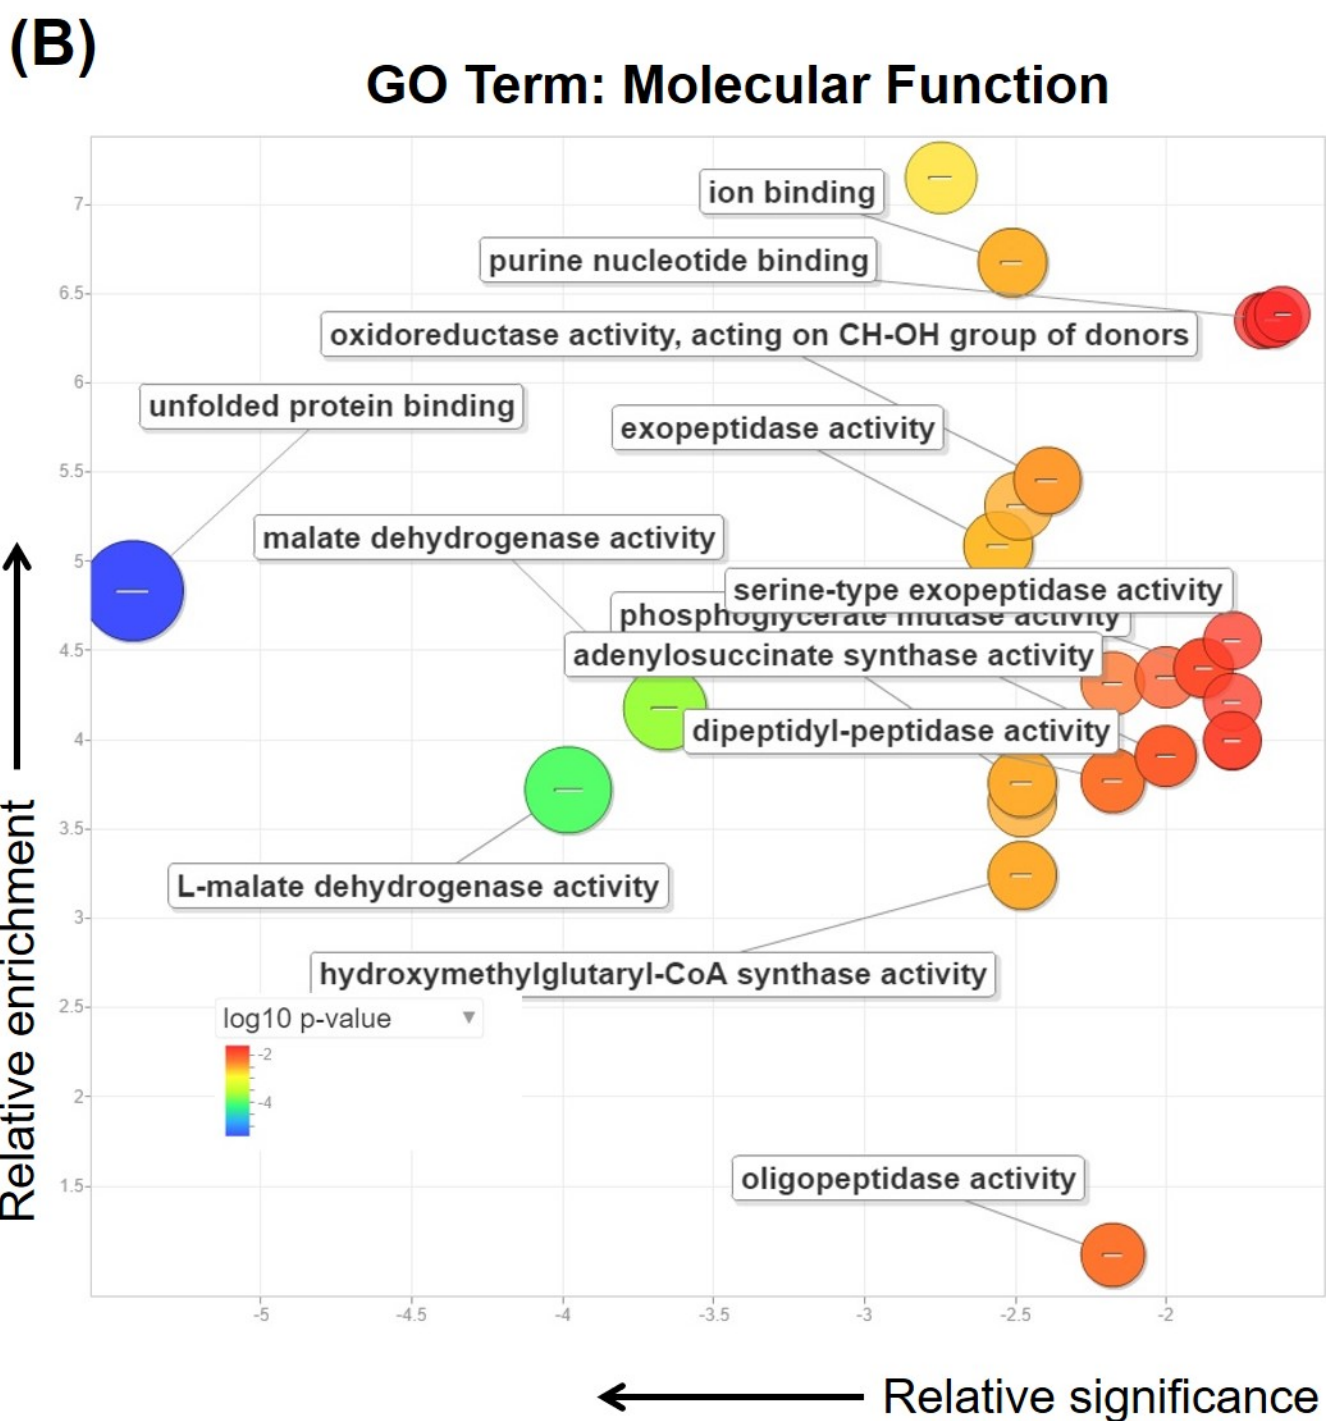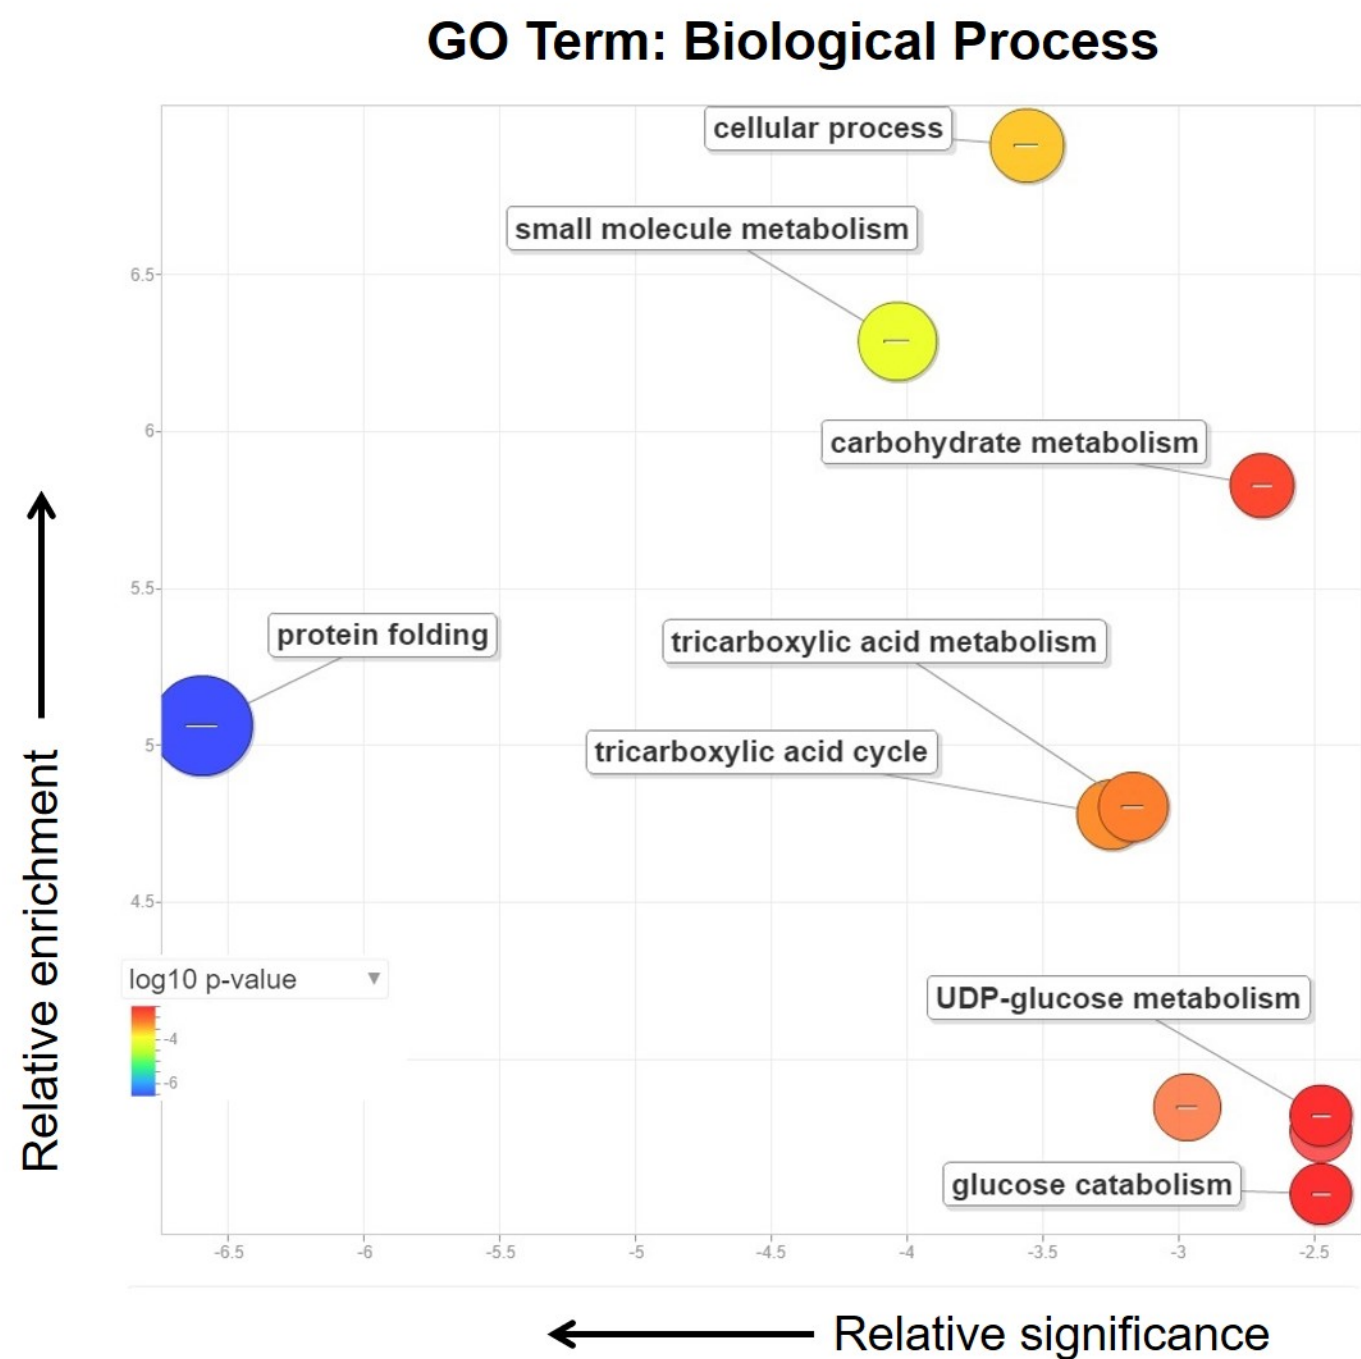

Supplement: mSystems.00089-21-sf003.pdf [file mSystems.00089-21-sf003.pdf]
